# Supplementary material for: Radiation exposure in cardiac computed tomography imaging in Mie prefecture in 2021
Source: PubMed Central journal article supplement (PMC10232629; doi:10.1007/s11604-022-01380-0), 2023-01-06
Supplement: 11604_2022_1380_MOESM1_ESM.pdf [file 11604_2022_1380_MOESM1_ESM.pdf]

Supplementary Table. 1

| Hospital | median<br>CTDIvol <sub>CCCTA</sub> | Image interpreter          | Major decision maker<br>of scan methods | Supervision by<br>Radiologist with<br>CBCCT* diploma | Number of<br>cardiac CT in<br>2021 | Number of<br>cardiac CT per<br>month | Number of beds | Site experience<br>in cardiac CT<br>(years) | CT system     |
|----------|------------------------------------|----------------------------|-----------------------------------------|------------------------------------------------------|------------------------------------|--------------------------------------|----------------|---------------------------------------------|---------------|
| A        | 3                                  | radiologist                | radiologist                             | Yes                                                  | 216                                | 18                                   | 440            | 15                                          | Dual-source   |
| B        | 13                                 | radiologist                | radiologist                             | Yes                                                  | 467                                | 39                                   | 685            | 15                                          | Dual-source   |
| C        | 19                                 | radiologist                | radiological technologist               |                                                      | 161                                | 13                                   | 486            | 11                                          | Area-detector |
| D        | 20                                 | radiologist                | radiological technologist               |                                                      | 121                                | 10                                   | 328            | 12                                          | Area-detector |
| E        | 25                                 | radiologist                | radiological technologist               | Yes                                                  | 111                                | 9                                    | 180            | 11                                          | Standard      |
| F        | 27                                 | radiologist                | radiological technologist               | Yes                                                  | 183                                | 15                                   | 430            | 10                                          | Area-detector |
| G        | 30                                 | radiologist / cardiologist | radiological technologist               |                                                      | 183                                | 15                                   | 423            | 11                                          | Area-detector |
| H        | 32                                 | cardiologist               | radiological technologist               |                                                      | 282                                | 24                                   | 379            | 14                                          | Dual-source   |
| I        | 32                                 | radiologist / cardiologist | radiological technologist               |                                                      | 721                                | 60                                   | 568            | 12                                          | Area-detector |
| J        | 34                                 | radiologist                | radiological technologist               |                                                      | 122                                | 10                                   | 335            | 12                                          | Area-detector |
| K        | 39                                 | cardiologist               | radiological technologist               |                                                      | 194                                | 16                                   | 460            | 11                                          | Standard      |
| L        | 48                                 | cardiologist               | radiological technologist               |                                                      | 273                                | 23                                   | 647            | 15                                          | Standard      |
| M        | 48                                 | radiologist                | radiological technologist               |                                                      | 180                                | 15                                   | 200            | 8                                           | Standard      |
| N        | 48                                 | radiologist                | radiological technologist               |                                                      | 363                                | 30                                   | 400            | 15                                          | Dual-source   |
| O        | 48                                 | cardiologist               | radiological technologist               |                                                      | 74                                 | 6                                    | 226            | 13                                          | Area-detector |
| P        | 55                                 | cardiologist               | radiological technologist               |                                                      | 490                                | 41                                   | 45             | 17                                          | Standard      |
| Q        | 68                                 | radiologist                | radiological technologist               |                                                      | 49                                 | 4                                    | 281            | 13                                          | Standard      |
| R        | 71                                 | cardiologist               | radiological technologist               |                                                      | 312                                | 26                                   | 199            | 14                                          | Area-detector |

\* CBCCT, Certification Board of Cardiovascular Computed Tomography
