# Supplementary material for: Radiation exposure in cardiac computed tomography imaging in Mie prefecture in 2021
Source: PubMed Central journal article supplement (PMC10232629; doi:10.1007/s11604-022-01380-0), 2023-01-06
Supplement: 11604_2022_1380_MOESM2_ESM.pdf [file 11604_2022_1380_MOESM2_ESM.pdf]

Supplementary Table. 2

| Vendor  | CT scanner                   | n | number of detector row | minimum gantry rotation time (s) |
|---------|------------------------------|---|------------------------|----------------------------------|
| Canon   | Aquilion Prime               | 1 | 80                     | 0.35                             |
|         | Aquilion Prime SP            | 4 | 80                     | 0.35                             |
|         | Aquilion One *               | 3 | 320                    | 0.35                             |
|         | Aquilion One ViSION Edition* | 2 | 320                    | 0.275                            |
|         | Aquilion One NATURE Edition* | 2 | 320                    | 0.275                            |
| Siemens | SOMATOM Definition Flash †   | 2 | 64                     | 0.28                             |
|         | SOMATOM Force †              | 1 | 96                     | 0.25                             |
|         | SOMATOM Drive †              | 1 | 64                     | 0.28                             |
|         | X.cite                       | 1 | 64                     | 0.3                              |
| Philips | Brilliance 64                | 1 | 64                     | 0.42                             |
|         | Brilliance iCT *             | 1 | 128                    | 0.27                             |
| GE      | Revolution Maxima            | 1 | 64                     | 0.35                             |

\* Area (16 or 8 cm) detector CT

† dual-source CT
